# Supplementary material for: Coordination chemistry of a bis(benzimidazole) disulfide: eleven membered chelate ring in cobalt(ii), zinc(ii) and cadmium(ii) halide compounds; oxidative disulfide cleavage when coordinated to nickel(ii)
Source: Royal Society of Chemistry journal article supplement (doi:10.1039/c0dt00084a), 2010-01-01
Supplement: c0dt00084a.pdf [file c0dt00084a.pdf]

## Supplementary Information

Coordination chemistry of a bis(benzimidazole) disulfide: eleven membered chelate ring in cobalt(II), zinc(II) and cadmium(II) halide compounds; oxidative disulfide cleavage when coordinated to nickel(II)

Adriana Esparza-Ruiz<sup>[a]</sup>, Guadalupe González-Gómez<sup>[a]</sup>, Edgar Mijangos<sup>[b]</sup>, Adrián Peña-Hueso<sup>[b]</sup>, Horacio López-Sandoval<sup>[a]</sup>, Angelina Flores-Parra<sup>[b]</sup>, Rosalinda Contreras<sup>\*[b]</sup>, Norah Barba-Behrens<sup>\*[a]</sup>

<sup>[a]</sup> Departamento de Química Inorgánica, Facultad de Química, Universidad Nacional Autónoma de México, C.U., Coyoacán, México, D.F., 04510, México, <sup>[b]</sup> Departamento de Química, Cinvestav, A. P. 14-740, México, D. F., 07000, México

### List of Contents

**Figure SI 1.** Strong O...H hydrogen bonds generate a macrocycle. Distances are O21...H3 [1.92(4) Å, O19...H1 [1.84(4) Å, O18...H7 [2.59(4) Å, O17...H222 [2.48(3) Å, O17...S20 [3.221(2) Å].

**Figure SI 2.** Some short contacts and hydrogen bonding in the solid state structure of compound 7.

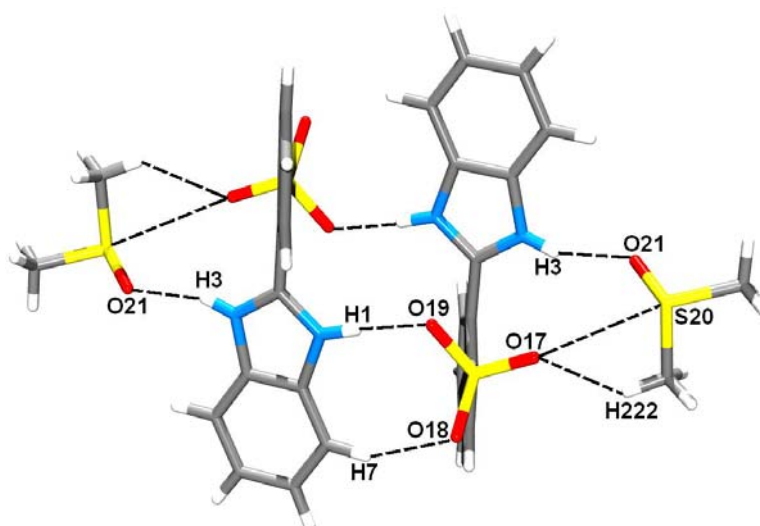

Fig. S1 Strong O...H hydrogen bonds generate a macrocycle. Distances are O21...H3 [1.92(4) Å, O19...H1 [1.84(4) Å, O18...H7 [2.59(4) Å, O17...H222 [2.48(3) Å, O17...S20 [3.221(2) Å].

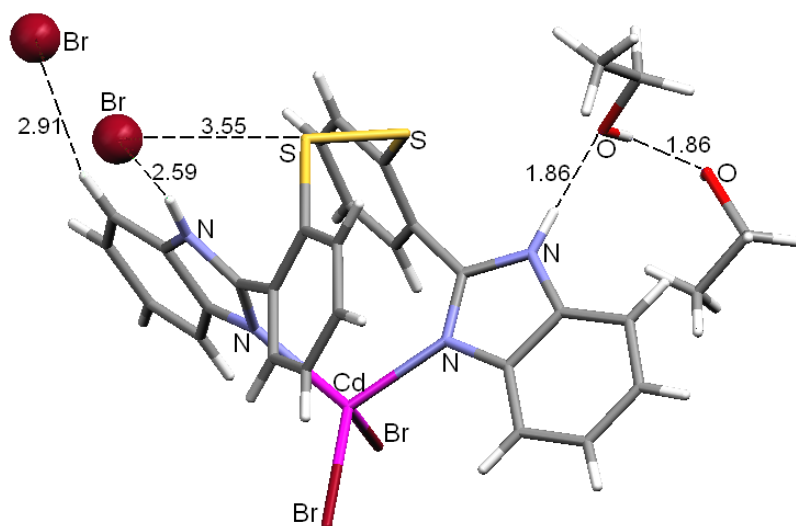

Fig.S2 . Some short contacts and hydrogen bonding in the solid state structure of compound 7.
